# Supplementary material for: Unveiling the distinct effect mechanisms of H 2 O: aggravating and mitigating SO 2 poisoning of Fe 2 O 3 and α-MnO 2 catalysts in low-temperature NH 3 -SCR
Source: Royal Society of Chemistry journal article supplement (doi:10.1039/d5ta09146b), 2026-01-01
Supplement: d5ta09146b1.pdf [file d5ta09146b1.pdf]

## Supplementary Information for

# Unveiling the distinct effect mechanisms of H<sub>2</sub>O: Aggravating and mitigating SO<sub>2</sub> poisoning of Fe<sub>2</sub>O<sub>3</sub> and $\alpha$ -MnO<sub>2</sub> catalysts in low-temperature NH<sub>3</sub>-SCR

Jianyi Zhang<sup>a,b,c,d</sup> §, Hongyu Zhao<sup>a,b,c,d</sup> §, Xuan Jia<sup>a,b,c,d</sup>, Jinxiu Wang<sup>a,b,d\*</sup>, Jinsheng Chen<sup>a,b,d</sup>

<sup>a</sup> State Key Laboratory of Advanced Environmental Technology, Institute of Urban Environment, Chinese Academy of Sciences, Xiamen 361021, P.R. China

<sup>b</sup> Fujian Key Laboratory of Atmospheric Ozone Pollution Prevention, Institute of Urban Environment, Chinese Academy of Sciences, Xiamen 361021, P.R. China

<sup>c</sup> College of Resources and Environment, Fujian Agriculture and Forestry University, Fuzhou 350002, P.R. China.

<sup>d</sup> University of Chinese Academy of Sciences, Beijing 100049, P.R. China

### Corresponding Author

\* Jinxiu Wang, Tel./Fax: +86 592 6190548, Email: [jxwang@iue.ac.cn](mailto:jxwang@iue.ac.cn)

§ Jianyi Zhang and Hongyu Zhao contributed equally to this paper.

## Contents

|                                                                                                                                                                                                                                                                                                                                                                                                                                                                                                                                                                                                       |          |
|-------------------------------------------------------------------------------------------------------------------------------------------------------------------------------------------------------------------------------------------------------------------------------------------------------------------------------------------------------------------------------------------------------------------------------------------------------------------------------------------------------------------------------------------------------------------------------------------------------|----------|
| <b>S1 Characterization details .....</b>                                                                                                                                                                                                                                                                                                                                                                                                                                                                                                                                                              | <b>4</b> |
| <b>S2 Main reaction and side reaction equations.....</b>                                                                                                                                                                                                                                                                                                                                                                                                                                                                                                                                              | <b>7</b> |
| <b>S3 Fe<sub>2</sub>(SO<sub>4</sub>)<sub>3</sub> dissolution test.....</b>                                                                                                                                                                                                                                                                                                                                                                                                                                                                                                                            | <b>8</b> |
| <b>S4 Supplemental data .....</b>                                                                                                                                                                                                                                                                                                                                                                                                                                                                                                                                                                     | <b>9</b> |
| <b>Table S1</b> The results of XRF (wt%), IC (ppm), and ICP-OES (ppm) .....                                                                                                                                                                                                                                                                                                                                                                                                                                                                                                                           | 9        |
| <b>Table S2</b> Test results of Fe element and SO <sub>4</sub> <sup>2-</sup> concentrations in 100 mg/L Fe <sub>2</sub> (SO <sub>4</sub> ) <sub>3</sub> aqueous solution (theoretical value 72.00 ppm SO <sub>4</sub> <sup>2-</sup> and 27.90 ppm Fe element) .....                                                                                                                                                                                                                                                                                                                                   | 10       |
| <b>Table S3</b> Specific surface area, total pore volume, and average pore diameter of the as-prepared catalysts.....                                                                                                                                                                                                                                                                                                                                                                                                                                                                                 | 11       |
| <b>Table S4</b> The ratio (%) of SO <sub>3</sub> <sup>2-</sup> and SO <sub>4</sub> <sup>2-</sup> species in XPS spectra for poisoned Fe <sub>2</sub> O <sub>3</sub> and α-MnO <sub>2</sub> catalysts .....                                                                                                                                                                                                                                                                                                                                                                                            | 12       |
| <b>Figure S1</b> (a) NO <sub>x</sub> Conversion and (b) N <sub>2</sub> Selectivity. Reaction conditions: 500 ppm NO <sub>x</sub> , 500 ppm NH <sub>3</sub> , 5 vol% O <sub>2</sub> , N <sub>2</sub> balance, 600 mg catalyst, GHSV = 60,000 mL • g <sup>-1</sup> • h <sup>-1</sup> .....                                                                                                                                                                                                                                                                                                              | 13       |
| <b>Figure S2</b> NO <sub>x</sub> conversions on (a) Fe <sub>2</sub> O <sub>3</sub> and (b and c) α-MnO <sub>2</sub> catalysts in NH <sub>3</sub> -SCR reaction in the presence of H <sub>2</sub> O, SO <sub>2</sub> , and the coexistence of both SO <sub>2</sub> and H <sub>2</sub> O (SH). Reaction conditions: 500 ppm NO <sub>x</sub> , 500 ppm NH <sub>3</sub> , 5 vol% O <sub>2</sub> , 5 vol% H <sub>2</sub> O (when needed), 100 ppm SO <sub>2</sub> (when needed), N <sub>2</sub> balance, reaction temperature: 150 or 250 °C, GHSV = 60,000 mL • g <sup>-1</sup> • h <sup>-1</sup> . ..... | 15       |
| <b>Figure S3</b> The outlet concentrations of NO, NO <sub>2</sub> , N <sub>2</sub> O and consumption of NH <sub>3</sub> (Δ NH <sub>3</sub> ) and NO <sub>x</sub> (Δ NO <sub>x</sub> ) with temperature for (a) Fe <sub>2</sub> O <sub>3</sub> and (b) α-MnO <sub>2</sub> catalysts.....                                                                                                                                                                                                                                                                                                               | 16       |
| <b>Figure S4</b> N <sub>2</sub> Selectivity on (a) Fe <sub>2</sub> O <sub>3</sub> and (b) α-MnO <sub>2</sub> catalysts at 200 °C in NH <sub>3</sub> -SCR reaction in the presence of H <sub>2</sub> O, SO <sub>2</sub> , and the coexistence of both SO <sub>2</sub> and H <sub>2</sub> O (SH). Reaction conditions: 500 ppm NO <sub>x</sub> , 500 ppm NH <sub>3</sub> , 5 vol% O <sub>2</sub> , 5 vol% H <sub>2</sub> O (when needed), 100 ppm SO <sub>2</sub> (when needed), N <sub>2</sub> balance, GHSV = 60,000 mL • g <sup>-1</sup> • h <sup>-1</sup> .....                                     | 17       |
| <b>Figure S5</b> The TG and DTG curves of (a) Fe <sub>2</sub> O <sub>3</sub> -S and Fe <sub>2</sub> O <sub>3</sub> -SH and (b) α-MnO <sub>2</sub> -S and α-                                                                                                                                                                                                                                                                                                                                                                                                                                           |          |

|                                                                                                                                                                                                                                                                                                                           |    |
|---------------------------------------------------------------------------------------------------------------------------------------------------------------------------------------------------------------------------------------------------------------------------------------------------------------------------|----|
| MnO <sub>2</sub> -SH catalysts.....                                                                                                                                                                                                                                                                                       | 19 |
| <b>Figure S6</b> XPS spectra for N 1s of fresh and poisoned (a) Fe <sub>2</sub> O <sub>3</sub> and (b) α-MnO <sub>2</sub> catalysts. ..                                                                                                                                                                                   | 20 |
| <b>Figure S7</b> The dissolution process of Fe <sub>2</sub> (SO <sub>4</sub> ) <sub>3</sub> . .....                                                                                                                                                                                                                       | 21 |
| <b>Figure S8</b> XPS spectra for Mn 3s of fresh and poisoned α-MnO <sub>2</sub> catalysts. ....                                                                                                                                                                                                                           | 22 |
| <b>Figure S9</b> XPS spectra for O 1s of fresh and poisoned (a) Fe <sub>2</sub> O <sub>3</sub> and (b) α-MnO <sub>2</sub> catalysts. .                                                                                                                                                                                    | 23 |
| <b>Figure S10</b> H <sub>2</sub> and SO <sub>2</sub> signal during H <sub>2</sub> -TPR of Fe <sub>2</sub> O <sub>3</sub> -S and Fe <sub>2</sub> O <sub>3</sub> -SH catalysts.....                                                                                                                                         | 24 |
| <b>Figure S11</b> (a) O <sub>2</sub> signal (m/z = 32) during NH <sub>3</sub> -TPD of α-MnO <sub>2</sub> , α-MnO <sub>2</sub> -S-50min, and α-MnO <sub>2</sub> -SH-50min catalysts, and (b) NH <sub>3</sub> -TPD patterns of α-MnO <sub>2</sub> and Fe <sub>2</sub> O <sub>3</sub> . ....                                 | 25 |
| <b>Figure S12</b> EPR spectra of Fe <sub>2</sub> O <sub>3</sub> and α-MnO <sub>2</sub> catalysts after the pretreatment under O <sub>2</sub> stream for 30 min and pretreatment under O <sub>2</sub> and H <sub>2</sub> O stream for 30 min. ....                                                                         | 26 |
| <b>Figure S13</b> O <sub>2</sub> -TPD pattern of Fe <sub>2</sub> O <sub>3</sub> catalyst after pre-adsorption with 5% O <sub>2</sub> /He.....                                                                                                                                                                             | 27 |
| <b>Figure S14</b> <i>In situ</i> DRIFT spectra of (A1, B1) NO + NH <sub>3</sub> + O <sub>2</sub> + SO <sub>2</sub> and (A2, B2) NO + NH <sub>3</sub> + O <sub>2</sub> + SO <sub>2</sub> + H <sub>2</sub> O adsorption of (A1, A2) Fe <sub>2</sub> O <sub>3</sub> and (B1, B2) α-MnO <sub>2</sub> catalysts at 250 °C..... | 29 |
| <b>Figure S15</b> NO <sub>x</sub> -TPD patterns of (a) Fe <sub>2</sub> O <sub>3</sub> -S-50min and Fe <sub>2</sub> O <sub>3</sub> -SH-50min and (b) α-MnO <sub>2</sub> -S-50min and α-MnO <sub>2</sub> -SH-50min catalysts (solid and dashed lines represent NO and NO <sub>2</sub> , respectively). ....                 | 31 |
| <b>References</b> .....                                                                                                                                                                                                                                                                                                   | 32 |

## S1 Characterization details

The crystal structure of the catalysts was characterized by X-ray powder diffraction (XRD). Prior to the measurements, all samples were thoroughly ground. The XRD patterns were acquired using a X'pert Pro diffractometer (PANalytical B.V., Holland) equipped with a Cu K $\alpha$  radiation ( $\lambda = 0.15406$  nm), operating at 40 kV and 40 mA. The scanning range was set from 10° to 90° (2 $\theta$ ). Semi-quantitative analysis of sulfur content in the poisoned catalyst powder was performed by Axios Max X-ray fluorescence spectrometer (XRF, PANalytical B.V., Holland). The concentrations of SO $_4^{2-}$  and NH $_4^+$  ions in the solution of the poisoned catalyst were analyzed by ion chromatography (IC, 883 Basic IC plus, Metrohm AG, Switzerland), and the concentrations of soluble metals ions (Mn and Fe) were determined using inductively coupled plasma optical emission spectrometry (ICP-OES, Avio 220 Max, PerkinElmer, Inc., USA). The catalyst sample was processed as follows: 20 mg of the powdered sample was immersed in 5 mL of aqueous solution containing CH $_2$ O (Guaranteed reagent, Sinopharm Chemical Reagent Co., Ltd., China) with 1% volume fraction and shaken continuously for 30 min. After soaking, the mixture was filtered through a 0.22  $\mu$ m membrane, and 2 mL of the filtrate was taken for subsequent analysis. The CH $_2$ O was added to the soaking solution of poisoned samples to inhibit the oxidation of sulfite during the testing procedure. Thermogravimetric analysis (TGA) coupled with derivative thermogravimetry (DTG) was performed on a Netzsch TG 209 F3 thermogravimetric analyzer (TG, Netzsch, Germany) to characterize the deposition of sulfur-containing species on the poisoned catalyst. The measurement was performed as follows: 10 mg of the catalyst powder was placed in a  $\gamma$ -Al $_2$ O $_3$  crucible and heated to 950 °C under a N $_2$  atmosphere (60 mL/min) at a rate of 10 °C/min. The N $_2$  adsorption-desorption isotherms were obtained using a NOVA 2000e physisorption analyzer (Quantachrome Corp, USA). The specific surface area was calculated by the Brunauer–Emmett–Teller (BET) method, and the pore size distribution was derived from the adsorption branch of the isotherm using the Barrett–Joyner–Halenda (BJH) model. The measurement procedure was conducted as follows: 0.15 g of powdered sample was vacuum-pretreated

at 80 °C for 5 h to remove adsorbed impurities on the surface and within the pores. Subsequently, the N<sub>2</sub> adsorption-desorption experiment was performed at 77 K. X-ray photoelectron spectroscopy (XPS) measurements were carried out on an AXIS Supra instrument (Shimadzu, Japan) using a monochromatic Al K $\alpha$  X-ray operated at 1486.8 eV and 150 W. All collected spectra were energy-referenced to the C 1s peak at 284.8 eV for calibration. H<sub>2</sub>-temperature programmed reduction (H<sub>2</sub>-TPR), temperature programmed desorption of NH<sub>3</sub> (NH<sub>3</sub>-TPD), and O<sub>2</sub>-temperature programmed desorption (O<sub>2</sub>-TPD) analyses were conducted on a ChemBET-3000 TPR-TPD chemisorption apparatus (Quantachrome Instruments, USA) coupled with a DYCOR LC-D200 mass spectrometer (AMETEK Inc., USA). In the H<sub>2</sub>-TPR experiment, 20 mg catalyst was placed in a U-shaped quartz reactor and pretreated under a He atmosphere at 100 °C for 60 min. After cooling to 35 °C approximately, the gas was switched to 5% H<sub>2</sub>/Ar. The temperature was then ramped to 800 °C at a rate of 10 °C/min. For the NH<sub>3</sub>-TPD test, 100 mg of catalyst powder was first purged under He flow at 180 °C for 90 min to remove impurities. After cooling to ~35 °C, the sample was exposed to 5 vol% NH<sub>3</sub>/He for 40 min. Then, the He flow was introduced while ramping to 100 °C, where it was maintained for 45 min to remove physisorption NH<sub>3</sub>. Finally, the temperature was increased to 700 °C at a rate of 10 °C/min under He flow. For O<sub>2</sub>-TPD test, 50 mg catalyst powder was initially purged with He at 100 °C for 30 min and then was exposed to a 5% O<sub>2</sub>/He (or 10% O<sub>2</sub>/He) steam for 60 min after cooled down to 35 °C. Finally, the system was flushed with pure He, followed by temperature ramping to 800 °C at a rate of 10 °C/min. NO<sub>x</sub>-temperature-programmed desorption (NO<sub>x</sub>-TPD) was used to evaluate the NO<sub>x</sub> adsorption capacity of the catalyst. NO<sub>x</sub>-TPD tests were measured in a simulated fixed bed reactor with a quartz tube  $\Phi$  6.0 mm  $\times$  470 mm. First, 150 mg fresh sample (40–60 mesh) performed SCR test under the reaction atmosphere containing SO<sub>2</sub>, or simultaneous SO<sub>2</sub> and H<sub>2</sub>O at 200 °C for 50 min (the sample treatment method was consistent with that described in section 2.3 “SCR activity test with separate SO<sub>2</sub> or H<sub>2</sub>O and coexistent SO<sub>2</sub> and H<sub>2</sub>O”). After the 50 min poisoning test, it was cooled under a N<sub>2</sub> atmosphere for 50 min. When the temperature cooled to ~35 °C, and then exposed to a gas mixture containing 2000 ppm NO and 5 vol% O<sub>2</sub> for 60 min.

Subsequently, the system was purged with N<sub>2</sub> by heating to 60 °C and holding for 60 min to remove any physically adsorbed species. Finally, the temperature was increased to 600 °C at a rate of 10 °C/min under N<sub>2</sub> flow. An Antaris IGS gas analyzer (Thermo Fisher Company, USA) was used to determine the concentrations of NO, N<sub>2</sub>O, and NO<sub>2</sub>. Electron paramagnetic resonance (EPR) spectra of catalyst powder were acquired on a Bruker A300 spectrometer (Bruker BioSpin GmbH, Germany). Measurements were performed at liquid nitrogen temperature (77 K). The g-values were calibrated using 1,1-diphenyl-2-picrylhydrazyl (DPPH) as the standard reference. *In situ* diffuse reflectance infrared Fourier transform spectroscopy (*in situ* DRIFTS) measurements were performed on a Bruker Vertex 70 spectrometer (Bruker, Germany) equipped with a high-temperature reaction cell with ZnSe windows and a mercury cadmium telluride (MCT) detector. All tested samples were prepared by grinding with KBr (Spectroscopic grade, Aladdin Biochemical Technology Co., Ltd., China) at a mass ratio of 1:10 for 20 min. All catalysts were pretreated at 250 °C in a stream of high purity N<sub>2</sub> (100 mL/min) for 40 min to eliminate surface impurities. Subsequently, the pretreated catalysts were exposed to either a mixture of 500 ppm NO + 500 ppm NH<sub>3</sub> + 5 vol% O<sub>2</sub> + 100 ppm SO<sub>2</sub> or the same mixture with the addition of 5 vol% H<sub>2</sub>O, using high purity N<sub>2</sub> as the balance gas at 200 °C or 250 °C for 30 min. Following the exposure, the system was purged with N<sub>2</sub> for 20 min. And the spectral signals were collected at a resolution of 4 cm<sup>-1</sup> with 64 accumulated scans.

## S2 Main reaction and side reaction equations

In SCR of  $\text{NO}_x$  with  $\text{NH}_3$ ,  $\text{NO}_x$  is reduced by  $\text{NH}_3$  to harmless  $\text{N}_2$  and  $\text{H}_2\text{O}$  over the catalyst. Usually, the reaction system primarily follows three key reaction pathways involved are the standard SCR reaction (1), the fast SCR reaction (2), and the slow SCR reaction (3). Adequate supply of  $\text{NO}_2$  promotes the fast SCR reaction at low temperatures. In this work, the initial feed gas contained 495 ppm NO and 5 ppm  $\text{NO}_2$ . The system primarily followed reaction (1). On Fe-based and Mn-based metal oxide catalysts,  $\text{NH}_3$  and NO can also react via parallel pathways, including the non-selective catalytic reduction (non-SCR, reaction (4)) and  $\text{NH}_3$  over-oxidation (reaction (5)), resulting in the undesired byproduct  $\text{N}_2\text{O}$ , as well as the oxidation of NO by  $\text{O}_2$  to form  $\text{NO}_2$  (reaction (6)).<sup>1</sup> When the primary reaction (1) co-occurs with the side reaction (4), the  $\text{NH}_3$  to NO consumption ratio ( $\Delta\text{NH}_3/\Delta\text{NO}$ ) is 1. Consequently, a measured  $\Delta\text{NH}_3/\Delta\text{NO}$  ratio of 1, accompanied by  $\text{N}_2\text{O}$  formation and without  $\text{NO}_2$  production, signifies the occurrence of non-SCR reaction, whereas  $\Delta\text{NH}_3/\Delta\text{NO} > 1$  implies the direct oxidation of  $\text{NH}_3$  occurs according to reaction (5).

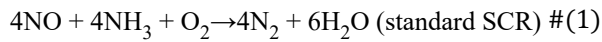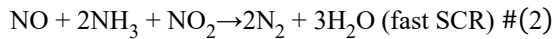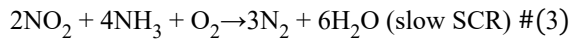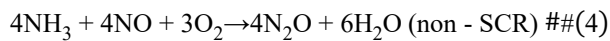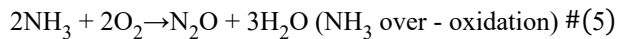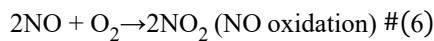

### S3 $\text{Fe}_2(\text{SO}_4)_3$ dissolution test

As shown in Figure 3 (a),  $\text{SO}_4^{2-}$  and  $\text{NH}_4^+$  were detected in the  $\text{Fe}_2\text{O}_3\text{-S}$ ,  $\text{Fe}_2\text{O}_3\text{-SH}$ ,  $\text{Fe}_2\text{O}_3\text{-S-50min}$ , and  $\text{Fe}_2\text{O}_3\text{-SH-50min}$  samples, whereas the Fe content was found to be extremely low, approaching the detection limit. Nevertheless, literature reports indicate that both  $\text{Fe}_2(\text{SO}_4)_3$  and ABS can form on the surface of  $\text{SO}_2$ -poisoned  $\text{Fe}_2\text{O}_3$  catalysts.<sup>2</sup> Furthermore,  $\text{Fe}^{3+}$  in  $\text{Fe}_2(\text{SO}_4)_3$  readily forms colloidal species in aqueous solution, which may interfere with detection efficiency after filtration. To investigate whether the physicochemical properties of  $\text{Fe}_2(\text{SO}_4)_3$  could lead to incomplete detection by IC and ICP-OES following filtration, a “ $\text{Fe}_2(\text{SO}_4)_3$  dissolution test” was specifically designed in this work. The results of this experiment can further verify whether  $\text{Fe}_2(\text{SO}_4)_3$  deposition is indeed absent on the surface of poisoned  $\text{Fe}_2\text{O}_3$  samples examined here. Given that XRF analysis indicated  $\text{SO}_4^{2-}$  contents of 67.74 ppm and 66.88 ppm for  $\text{Fe}_2\text{O}_3\text{-S}$  and  $\text{Fe}_2\text{O}_3\text{-SH}$  samples, respectively, which are higher than the corresponding IC results (32.72 ppm and 31.97 ppm). Thus, the  $\text{Fe}_2(\text{SO}_4)_3$  dissolution test was conducted using a concentration of 100 mg/L (approximately 72 ppm  $\text{SO}_4^{2-}$ ) based on the XRF results. The testing method for this experiment is as follows:

100 mg of  $\text{Fe}_2(\text{SO}_4)_3$  was dissolved in 1000 mL of ultrapure water and allowed to stand for 30 min. The solution was then filtered using a suction flask equipped with a 0.22  $\mu\text{m}$  membrane filter. Subsequently, 2 mL of the filtrate was collected to analyze. The concentration of  $\text{SO}_4^{2-}$  was quantified using IC, while the concentration of Fe elemental was analyzed by ICP-OES. To ensure the reliability of the experimental results, replicate experiments were conducted on five parallel samples.



## S4 Supplemental data

**Table S1** The results of XRF (wt%), IC (ppm), and ICP-OES (ppm)

| Samples                                  | SO <sub>4</sub> <sup>2-</sup><br>by XRF | SO <sub>4</sub> <sup>2-</sup><br>by IC | NH <sub>4</sub> <sup>+</sup> | Me    |
|------------------------------------------|-----------------------------------------|----------------------------------------|------------------------------|-------|
| Fe <sub>2</sub> O <sub>3</sub> -S        | 1.69                                    | 32.72                                  | 17.51                        | 0.00  |
| Fe <sub>2</sub> O <sub>3</sub> -SH       | 1.67                                    | 31.97                                  | 15.41                        | 0.23  |
| Fe <sub>2</sub> O <sub>3</sub> -S-50min  | /                                       | 33.20                                  | 16.60                        | 0.01  |
| Fe <sub>2</sub> O <sub>3</sub> -SH-50min | /                                       | 34.54                                  | 13.79                        | 0.01  |
| $\alpha$ -MnO <sub>2</sub> -S            | 1.55                                    | 63.58                                  | 0.47                         | 39.54 |
| $\alpha$ -MnO <sub>2</sub> -SH           | 2.61                                    | 120.83                                 | 0.62                         | 72.65 |
| $\alpha$ -MnO <sub>2</sub> -S-50min      | /                                       | 73.89                                  | 2.42                         | 37.00 |
| $\alpha$ -MnO <sub>2</sub> -SH-50min     | /                                       | 88.38                                  | 1.62                         | 49.51 |

Note: / indicates that the sample was not subjected to XRF.

The theoretical concentrations of Fe element and  $\text{SO}_4^{2-}$  in 100 mg/L  $\text{Fe}_2(\text{SO}_4)_3$  aqueous solution are 27.90 ppm and 72.00 ppm, respectively. The calculation process is shown in Equations (7) to (9), where  $M(\text{Fe}_2(\text{SO}_4)_3)$ ,  $M(\text{SO}_4^{2-})$ , and  $M(\text{Fe})$  represent the molar masses of  $\text{Fe}_2(\text{SO}_4)_3$ ,  $\text{SO}_4^{2-}$ , and Fe element, respectively, and  $V$  denotes the volume of the aqueous solution. As shown in Figure S7, the results indicated that the  $\text{Fe}_2(\text{SO}_4)_3$  solution formed a colloid. As shown in Table S2, the filtration process resulted in that measured values of  $\text{SO}_4^{2-}$  and Fe element were lower than the theoretical values. The actual measured concentrations of  $\text{SO}_4^{2-}$  and Fe element approximately were 41.17% and 34.98% of their fully dissolved concentrations in the  $\text{Fe}_2(\text{SO}_4)_3$  solution.

The amount of substance of  $\text{Fe}_2(\text{SO}_4)_3$ :

$$n = \frac{m_{\text{Fe}_2(\text{SO}_4)_3}}{M(\text{Fe}_2(\text{SO}_4)_3)} = \frac{0.1000 \text{ g}}{399.88 \text{ g} \cdot \text{mol}^{-1}} = 2.5 \times 10^{-4} \text{ mol} \# (7)$$

The concentration of Fe element:

$$C_{\text{Fe}} = \frac{2 \times n \times M(\text{Fe})}{V} = \frac{2 \times 2.5 \times 10^{-4} \text{ mol} \times 55.85 \text{ g} \cdot \text{mol}^{-1}}{1 \text{ L}} = 27.90 \text{ ppm} \# (8)$$

The concentration of  $\text{SO}_4^{2-}$ :

$$C_{\text{SO}_4^{2-}} = \frac{3 \times n \times M(\text{SO}_4^{2-})}{V} = \frac{3 \times 2.5 \times 10^{-4} \text{ mol} \times 96.06 \text{ g} \cdot \text{mol}^{-1}}{1 \text{ L}} = 72.00 \text{ ppm} \# (9)$$

**Table S2** Test results of Fe element and  $\text{SO}_4^{2-}$  concentrations in 100 mg/L  $\text{Fe}_2(\text{SO}_4)_3$  aqueous solution (theoretical value 72.00 ppm  $\text{SO}_4^{2-}$  and 27.90 ppm Fe element)

| Parallel samples | $\text{SO}_4^{2-}$ / ppm | Fe / ppm |
|------------------|--------------------------|----------|
| 1#               | 32.23                    | 9.70     |
| 2#               | 29.48                    | 9.94     |
| 3#               | 30.53                    | 9.45     |
| 4#               | 27.56                    | 9.92     |
| 5#               | 28.42                    | 9.87     |

|         |       |      |
|---------|-------|------|
| Average | 29.64 | 9.76 |
|---------|-------|------|

---

**Table S3** Specific surface area, total pore volume, and average pore diameter of the as-prepared catalysts

| Samples                           | $S_{\text{BET}}$<br>( $\text{m}^2/\text{g}$ ) | $V_{\text{p}}$<br>( $\text{cm}^3/\text{g}$ ) | $D_{\text{A}}$<br>(nm) |
|-----------------------------------|-----------------------------------------------|----------------------------------------------|------------------------|
| $\text{Fe}_2\text{O}_3$           | 88.1                                          | 0.30                                         | 13.5                   |
| $\text{Fe}_2\text{O}_3\text{-S}$  | 75.3                                          | 0.25                                         | 13.3                   |
| $\text{Fe}_2\text{O}_3\text{-SH}$ | 76.3                                          | 0.24                                         | 12.8                   |
| $\alpha\text{-MnO}_2$             | 34.0                                          | 0.13                                         | 15.2                   |
| $\alpha\text{-MnO}_2\text{-S}$    | 27.4                                          | 0.12                                         | 18.5                   |
| $\alpha\text{-MnO}_2\text{-SH}$   | 22.3                                          | 0.11                                         | 21.0                   |

**Table S4** The ratio (%) of  $\text{SO}_3^{2-}$ - and  $\text{SO}_4^{2-}$  species in XPS spectra for poisoned  $\text{Fe}_2\text{O}_3$  and  $\alpha\text{-MnO}_2$  catalysts

| Samples                                 | $\text{SO}_3^{2-}$ ratio | $\text{SO}_4^{2-}$ ratio |
|-----------------------------------------|--------------------------|--------------------------|
| $\text{Fe}_2\text{O}_3\text{-S}$        | 6.5                      | 93.5                     |
| $\text{Fe}_2\text{O}_3\text{-SH}$       | 7.8                      | 92.2                     |
| $\text{Fe}_2\text{O}_3\text{-S-50min}$  | 13.6                     | 86.4                     |
| $\text{Fe}_2\text{O}_3\text{-SH-50min}$ | 12.0                     | 88.0                     |
| $\alpha\text{-MnO}_2\text{-S}$          | 16.1                     | 83.9                     |
| $\alpha\text{-MnO}_2\text{-SH}$         | 25.7                     | 74.3                     |
| $\alpha\text{-MnO}_2\text{-S-50min}$    | 13.8                     | 86.2                     |
| $\alpha\text{-MnO}_2\text{-SH-50min}$   | 28.5                     | 71.5                     |

The  $\text{NO}_x$  conversion and  $\text{N}_2$  selectivity of  $\text{Fe}_2\text{O}_3$  and  $\alpha\text{-MnO}_2$  catalysts over the temperature range of 150–250 °C are shown in Figure S1 (a) and (b), respectively. At 150 °C, the  $\text{NO}_x$  conversion of  $\text{Fe}_2\text{O}_3$  catalyst was only 21.3%, but it exhibited a continuous increase with rising temperature over the range of 150–250 °C. The  $\text{NO}_x$  conversion of  $\text{Fe}_2\text{O}_3$  catalyst remains above 85% when the temperature exceeds 200 °C. The  $\text{NO}_x$  conversion of  $\alpha\text{-MnO}_2$  catalyst remained at 100% within the temperature range of 150–200 °C, while it decreased with increasing temperature when the temperature exceeded 200 °C, dropping to 73.0% at 250 °C. At 150–250 °C,  $\text{Fe}_2\text{O}_3$  catalyst exhibited nearly 100%  $\text{N}_2$  selectivity. The  $\text{N}_2$  selectivity of  $\alpha\text{-MnO}_2$  catalyst was 68.3% at 150 °C, but declined with increasing temperature.

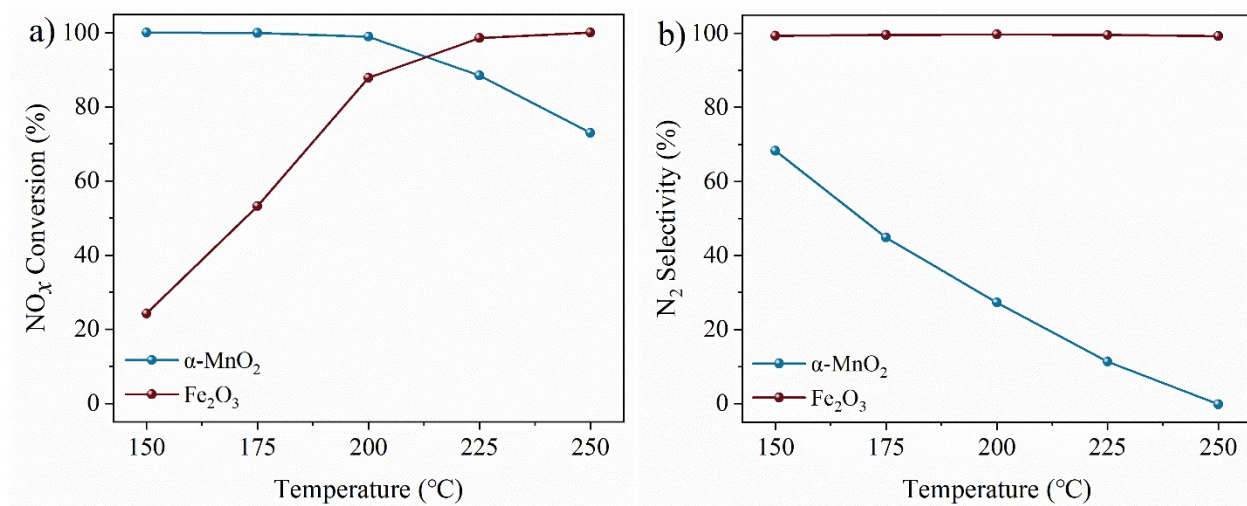

**Figure S1** (a)  $\text{NO}_x$  Conversion and (b)  $\text{N}_2$  Selectivity. Reaction conditions: 500 ppm  $\text{NO}_x$ , 500 ppm  $\text{NH}_3$ , 5 vol%  $\text{O}_2$ ,  $\text{N}_2$  balance, 600 mg catalyst, GHSV = 60,000  $\text{mL}\cdot\text{g}^{-1}\cdot\text{h}^{-1}$ .

As shown in Figure S2 (a)†,  $\text{Fe}_2\text{O}_3$  catalyst exhibited stable  $\text{NO}_x$  conversion of 100% at 250 °C. The  $\text{NO}_x$  conversion decreased to 92.6% upon introducing 5 vol%  $\text{H}_2\text{O}$  but was fully restored after its removal. When 100 ppm  $\text{SO}_2$  as well as coexistent 100 ppm  $\text{SO}_2$  and 5 vol%  $\text{H}_2\text{O}$  were introduced into the feed gas, the  $\text{NO}_x$  conversion decreased to 54.9% and 28.8%, respectively. The  $\text{NO}_x$  conversion of  $\text{SO}_2$ - $\text{H}_2\text{O}$  poisoned sample rapidly recovered after removing  $\text{SO}_2$  and  $\text{H}_2\text{O}$ , returning close to the level of  $\text{SO}_2$ -poisoned sample alone. The results demonstrated that  $\text{H}_2\text{O}$  also aggravated the  $\text{SO}_2$  poisoning of  $\text{Fe}_2\text{O}_3$  catalyst at 250 °C, while its inhibitory effect remained reversible.

As shown in Figure S2 (b) and (c)†,  $\alpha\text{-MnO}_2$  catalyst exhibited stable  $\text{NO}_x$  conversion of 65.8% at 250 °C and 100% at 150 °C. After The introduction of 5 vol%  $\text{H}_2\text{O}$ , the  $\text{NO}_x$  conversion increased to 84.4% at 250 °C and decreased to 76.3% at 150 °C, which was fully restored upon  $\text{H}_2\text{O}$  removal. At 250 °C, the  $\text{NO}_x$  conversion of  $\alpha\text{-MnO}_2\text{-SH-250}$  sample was higher than that of  $\alpha\text{-MnO}_2\text{-S-250}$  during the initial 1.5 h. Subsequently, it dropped below that of  $\alpha\text{-MnO}_2\text{-S-250}$  after 1.5 h. Similar to the trend observed at 200 °C,  $\text{H}_2\text{O}$  effectively alleviated  $\text{SO}_2$  poisoning of  $\alpha\text{-MnO}_2$  catalyst during the initial period. At 150 °C, when 100 ppm  $\text{SO}_2$  as well as coexistent 100 ppm  $\text{SO}_2$  and 5 vol%  $\text{H}_2\text{O}$  were introduced into the feed gas, the  $\text{NO}_x$  conversion dropped to 9.8% and 11.5%, respectively. The results indicate that  $\text{H}_2\text{O}$  also alleviates  $\text{SO}_2$  poisoning on  $\alpha\text{-MnO}_2$  at 150 °C, even throughout the whole co-exposure duration, longer than that at 200 °C.

Regrettably, due to the very low  $\text{NO}_x$  conversion of  $\text{Fe}_2\text{O}_3$  catalyst at 150 °C and 175 °C (Figure S1†), further SCR activity tests under conditions of separate  $\text{SO}_2$  or  $\text{H}_2\text{O}$  and coexistent  $\text{SO}_2$  and  $\text{H}_2\text{O}$  were not performed.

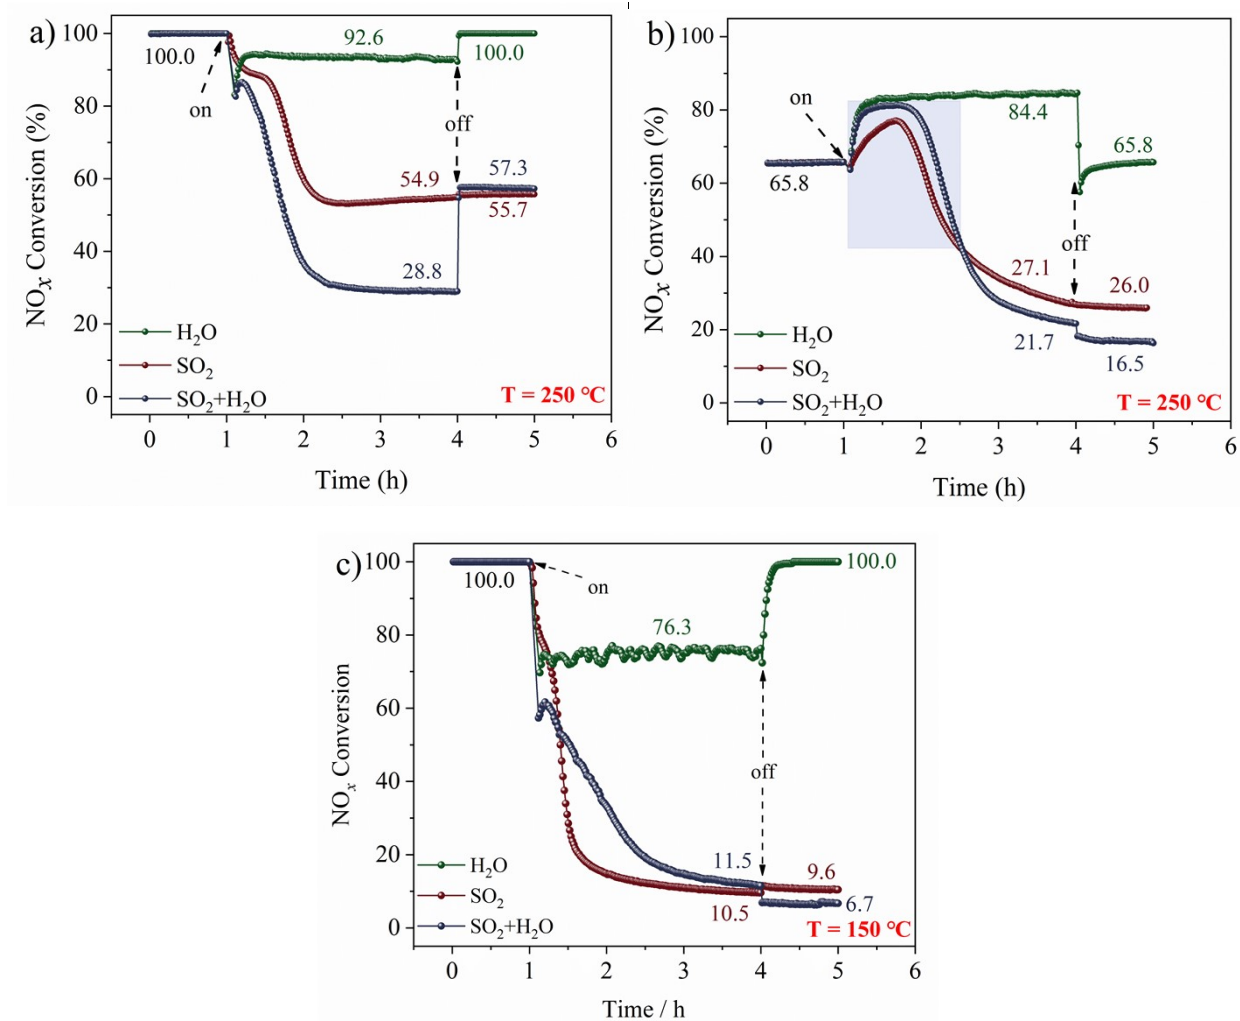

**Figure S2** NO<sub>x</sub> conversions on (a) Fe<sub>2</sub>O<sub>3</sub> and (b and c) α-MnO<sub>2</sub> catalysts in NH<sub>3</sub>-SCR reaction in the presence of H<sub>2</sub>O, SO<sub>2</sub>, and the coexistence of both SO<sub>2</sub> and H<sub>2</sub>O (SH). Reaction conditions: 500 ppm NO<sub>x</sub>, 500 ppm NH<sub>3</sub>, 5 vol% O<sub>2</sub>, 5 vol% H<sub>2</sub>O (when needed), 100 ppm SO<sub>2</sub> (when needed), N<sub>2</sub> balance, reaction temperature: 150 or 250 °C, GHSV = 60,000 mL·g<sup>-1</sup>·h<sup>-1</sup>.



The consumption of  $\text{NH}_3$  ( $\Delta\text{NH}_3$ ) and  $\text{NO}_x$  ( $\Delta\text{NO}_x$ ) were calculated by following equations:

$$\Delta\text{NH}_3 = [\text{NH}_3]_{\text{in}} - [\text{NH}_3]$$

$$\Delta\text{NO}_x = [\text{NO}_x]_{\text{in}} - [\text{NO}_x]_{\text{out}}$$

$[\text{NO}_x]_{\text{in}}$ ,  $[\text{NO}_x]_{\text{out}}$ ,  $[\text{NH}_3]_{\text{in}}$ , and  $[\text{NH}_3]_{\text{out}}$  mean the inlet and outlet concentrations of  $\text{NO}_x$  and  $\text{NH}_3$ , respectively.

Figure S3† displays the outlet concentrations of  $\text{NO}$ ,  $\text{NO}_2$ ,  $\text{N}_2\text{O}$  and consumption of  $\text{NH}_3$  ( $\Delta\text{NH}_3$ ) and  $\text{NO}_x$  ( $\Delta\text{NO}_x$ ) with temperature for  $\text{Fe}_2\text{O}_3$  and  $\alpha\text{-MnO}_2$  catalysts. The main reaction and side reaction equations are described in “Section S2† reaction (1)–(6)”. As shown in Figure S3 (a)†, no byproducts were observed, with side reactions being negligible over  $\text{Fe}_2\text{O}_3$  catalyst at 150–250 °C. For  $\alpha\text{-MnO}_2$  (Figure S3 (b)†), the non-SCR reaction was responsible for  $\text{N}_2\text{O}$  formation between 150 and 200 °C, while  $\text{NH}_3$  over-oxidation initiated above 200 °C and intensified with increasing temperature.<sup>3</sup> Additionally, the increase in temperature correlated with enhanced oxidative capacity of  $\alpha\text{-MnO}_2$ , giving rise to observable  $\text{NO}$  oxidation at temperatures exceeding 200 °C.

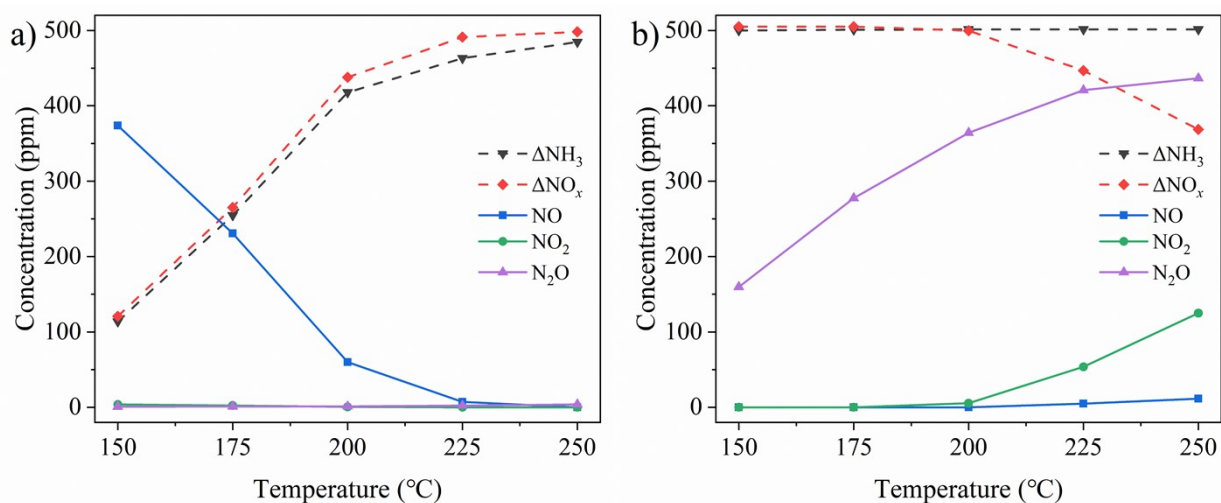

**Figure S3** The outlet concentrations of  $\text{NO}$ ,  $\text{NO}_2$ ,  $\text{N}_2\text{O}$  and consumption of  $\text{NH}_3$  ( $\Delta\text{NH}_3$ ) and  $\text{NO}_x$  ( $\Delta\text{NO}_x$ ) with temperature for (a)  $\text{Fe}_2\text{O}_3$  and (b)  $\alpha\text{-MnO}_2$  catalysts.

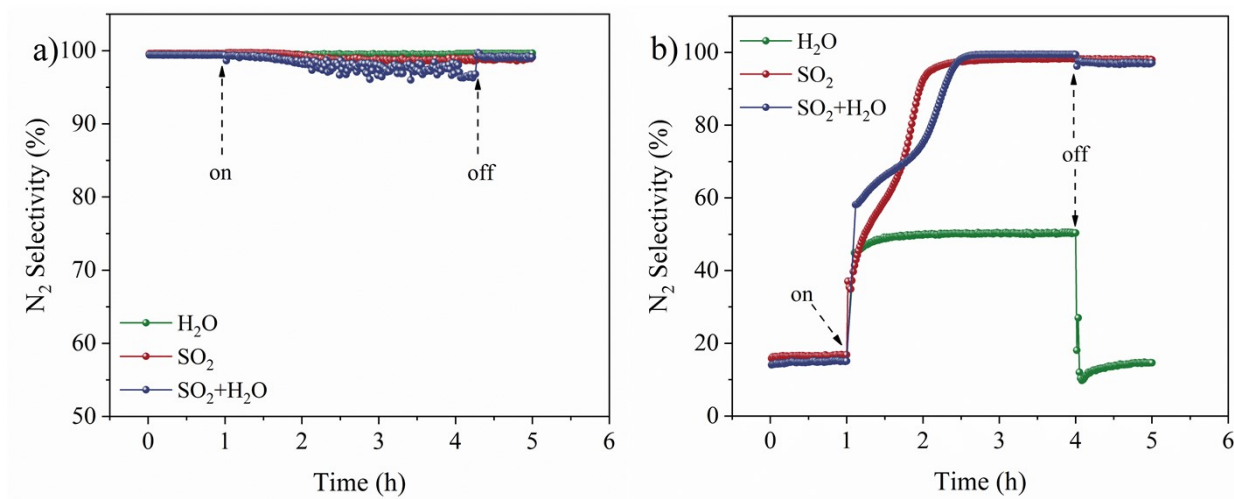

**Figure S4** N<sub>2</sub> Selectivity on (a) Fe<sub>2</sub>O<sub>3</sub> and (b) α-MnO<sub>2</sub> catalysts at 200 °C in NH<sub>3</sub>-SCR reaction in the presence of H<sub>2</sub>O, SO<sub>2</sub>, and the coexistence of both SO<sub>2</sub> and H<sub>2</sub>O (SH). Reaction conditions: 500 ppm NO<sub>x</sub>, 500 ppm NH<sub>3</sub>, 5 vol% O<sub>2</sub>, 5 vol% H<sub>2</sub>O (when needed), 100 ppm SO<sub>2</sub> (when needed), N<sub>2</sub> balance, GHSV = 60,000 mL·g<sup>-1</sup>·h<sup>-1</sup>.

As shown in Figure S5†, TG was performed on both fresh and poisoned Fe<sub>2</sub>O<sub>3</sub> and α-MnO<sub>2</sub> catalysts to analyze the composition of sulfur-containing species in the poisoned catalysts. Darezereshki et al. employed TG-DSC analysis on pure-phase γ-Fe<sub>2</sub>O<sub>3</sub> and observed two endothermic peaks (88.6 °C and 232.6 °C) and one exothermic peak (467.6 °C) during heating, corresponding to the desorption of physically adsorbed water, the removal of chemically adsorbed water, and the decomposition transformation of γ-Fe<sub>2</sub>O<sub>3</sub> into α-Fe<sub>2</sub>O<sub>3</sub>, respectively.<sup>4</sup> Zhong et al. reported that the weight loss peaks observed at 240 °C and 366 °C in SO<sub>2</sub>-poisoned Mn/TiO<sub>2</sub> catalysts can be attributed to the decomposition of ammonium sulfate and ammonium bisulfate, respectively.<sup>5</sup> Cheng et al. assigned the weight loss at 200–550 °C in SO<sub>2</sub>-poisoned α-Fe<sub>2</sub>O<sub>3</sub> to ammonium sulfate decomposition, and that above 550 °C to Fe<sub>2</sub>(SO<sub>4</sub>)<sub>3</sub> decomposition.<sup>6</sup> Therefore, as shown in Figure S5 (a)†, the weight loss process of Fe<sub>2</sub>O<sub>3</sub>-S and Fe<sub>2</sub>O<sub>3</sub>-SH catalysts was divided into three stages: The weight loss in Stage I (< 250 °C) was attributed to the desorption of physically adsorbed H<sub>2</sub>O from the catalyst surface. Stage II (250–550 °C) was associated with the decomposition of ammonium sulfate salts, accompanied by the crystal phase transformation from γ-Fe<sub>2</sub>O<sub>3</sub> to α-Fe<sub>2</sub>O<sub>3</sub>. Stage III (550–830 °C) resulted from the decomposition of Fe<sub>2</sub>(SO<sub>4</sub>)<sub>3</sub>.<sup>4</sup> Similarly, it was concluded that both ammonium sulfate and Fe<sub>2</sub>(SO<sub>4</sub>)<sub>3</sub> were formed on Fe<sub>2</sub>O<sub>3</sub>-S and Fe<sub>2</sub>O<sub>3</sub>-SH catalysts. Furthermore, the similar content of sulfur-containing species observed on these poisoned Fe<sub>2</sub>O<sub>3</sub> catalysts indicated that the introduction of H<sub>2</sub>O did not significantly affect the quantity of generated sulfur-containing species. Song et al. observed that the thermal decomposition of pure α-MnO<sub>2</sub> to Mn<sub>3</sub>O<sub>4</sub> occurs within 510–800 °C, accompanied by O<sub>2</sub> release and mass loss.<sup>7</sup> An et al. attributed the weight loss peak observed on SO<sub>2</sub>-poisoned MnO<sub>2</sub> catalysts to MnSO<sub>4</sub> decomposition above 700 °C.<sup>8</sup> As shown in Figure S5 (b)†, the TG profiles of α-MnO<sub>2</sub>-S and α-MnO<sub>2</sub>-SH showed four main weight loss stages.<sup>7, 9</sup> Stage I (< 250 °C) was attributed to the desorption of physically adsorbed H<sub>2</sub>O from the sample surface. Stage II (250–500 °C) corresponded to the removal of structural H<sub>2</sub>O and the decomposition of ammonium sulfate salts. Stage III (500–700 °C) arose from the decomposition of MnO<sub>2</sub> into Mn<sub>2</sub>O<sub>3</sub>. Stage IV (700–

900 °C) was caused by the further decomposition of  $\text{Mn}_2\text{O}_3$  into  $\text{Mn}_3\text{O}_4$  along with the decomposition of  $\text{MnSO}_4$ . Due to the overlapping decomposition processes of  $\text{MnO}_2$  and sulfur-containing species, quantitative analysis proved infeasible. Nevertheless, weight loss steps corresponding to ammonium sulfate salts and  $\text{MnSO}_4$  were clearly observed in both  $\alpha\text{-MnO}_2\text{-S}$  and  $\alpha\text{-MnO}_2\text{-SH}$  catalysts, confirming the formation of these sulfur-containing species on the poisoned catalysts.

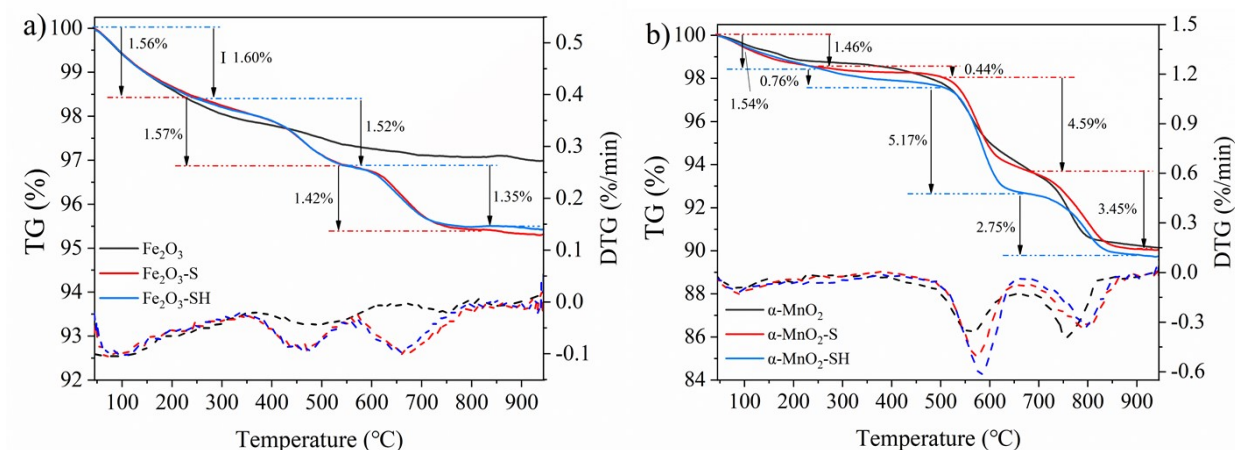

**Figure S5** The TG and DTG curves of (a)  $\text{Fe}_2\text{O}_3\text{-S}$  and  $\text{Fe}_2\text{O}_3\text{-SH}$  and (b)  $\alpha\text{-MnO}_2\text{-S}$  and  $\alpha\text{-MnO}_2\text{-SH}$  catalysts.

As shown in Figures S6 (a) and (b), peaks corresponding to amine nitrogen species (400.0–400.6 eV) and  $\text{NH}_4^+$  (401.7–401.8 eV) were identified by deconvolution of the N 1s XPS spectra.<sup>10, 11</sup> Distinct amine nitrogen species were observed on both  $\text{Fe}_2\text{O}_3$  and  $\alpha\text{-MnO}_2$  samples, originating from the residual  $\text{NH}_3\cdot\text{H}_2\text{O}$  or urea precursor used during their synthesis.

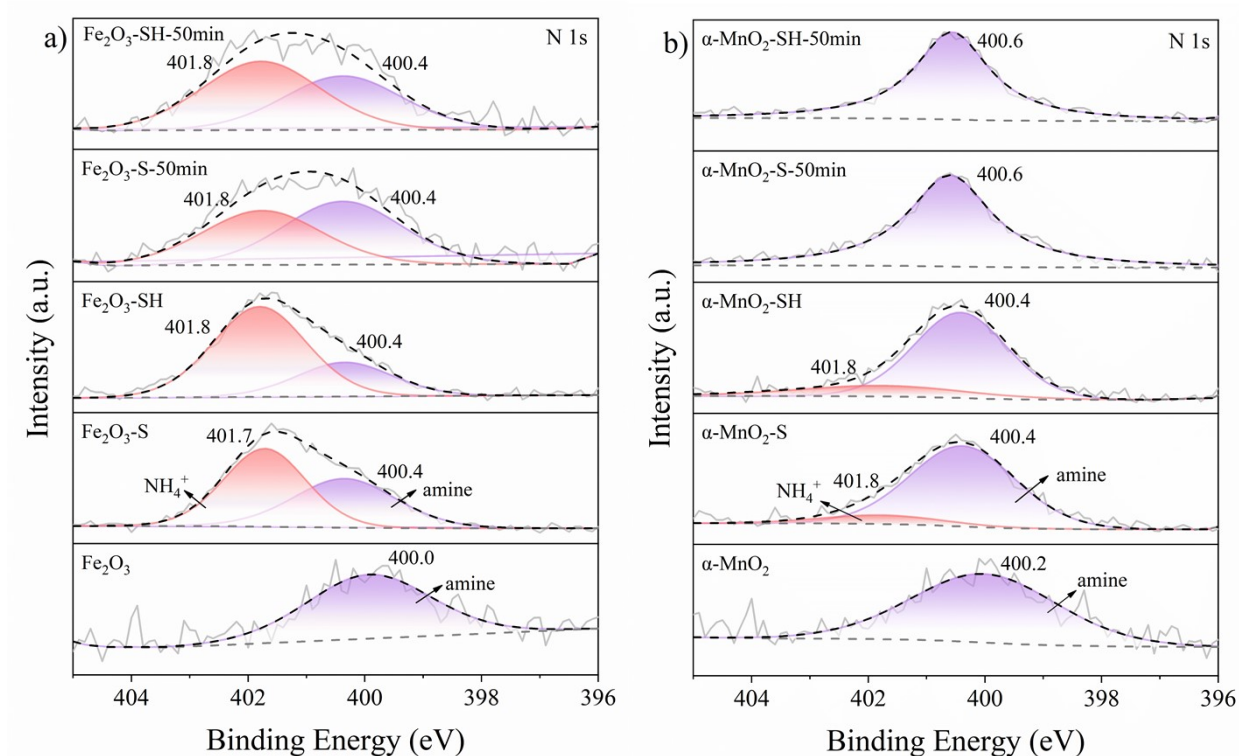

**Figure S6** XPS spectra for N 1s of fresh and poisoned (a)  $\text{Fe}_2\text{O}_3$  and (b)  $\alpha\text{-MnO}_2$  catalysts.

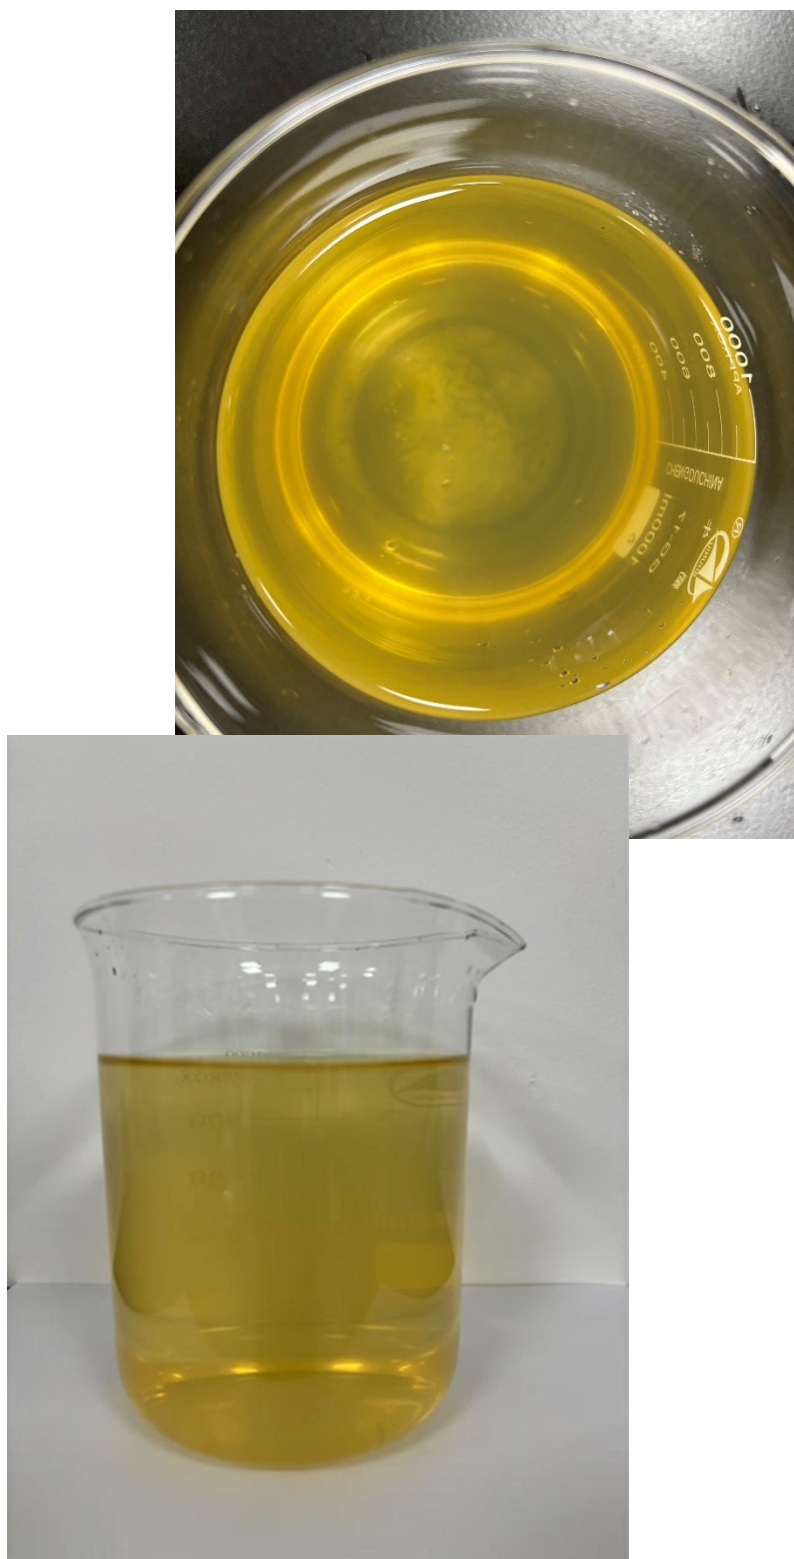

**Figure S7** The dissolution process of  $\text{Fe}_2(\text{SO}_4)_3$ .

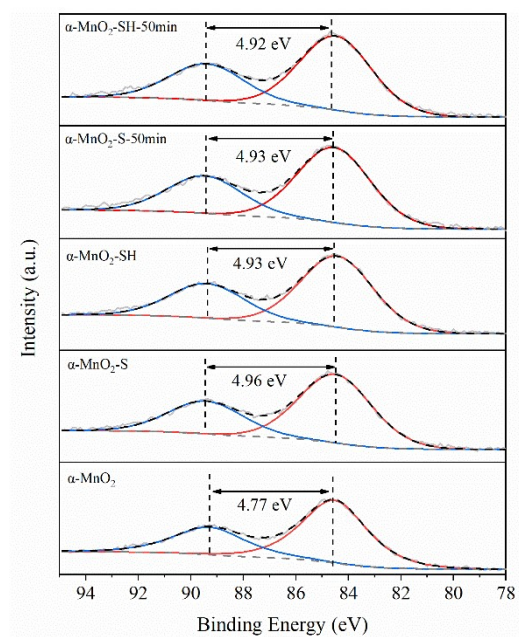

**Figure S8** XPS spectra for Mn 3s of fresh and poisoned  $\alpha\text{-MnO}_2$  catalysts.



As shown in Figure S9 (a) and (b), three characteristic peaks were obtained by fitting the O 1s XPS spectra of fresh and poisoned  $\text{Fe}_2\text{O}_3$  and  $\alpha\text{-MnO}_2$  catalysts. The peak located at 529.7–530.3 eV is attributed to lattice oxygen ( $\text{O}_\gamma$ ), the peak at 531.5–531.8 eV is assigned to surface OH groups and low-coordinated oxygen ( $\text{O}_\beta$ ), and the peak in the range of 533.2–533.8 eV corresponds to adsorbed water and weakly adsorbed oxygen ( $\text{O}_\alpha$ ).<sup>12</sup> Usually,  $\text{O}_\alpha$  and  $\text{O}_\beta$  can be collectively referred to as surface chemically adsorbed oxygen.

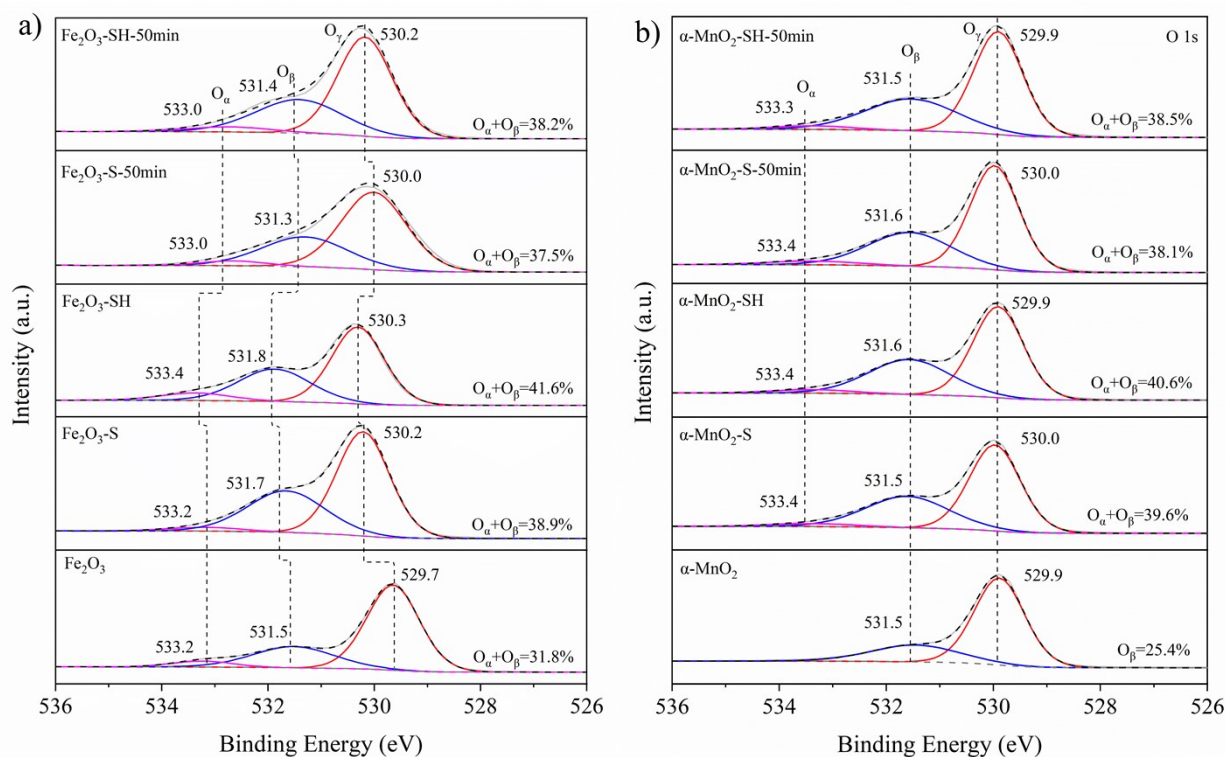

**Figure S9** XPS spectra for O 1s of fresh and poisoned (a)  $\text{Fe}_2\text{O}_3$  and (b)  $\alpha\text{-MnO}_2$  catalysts.



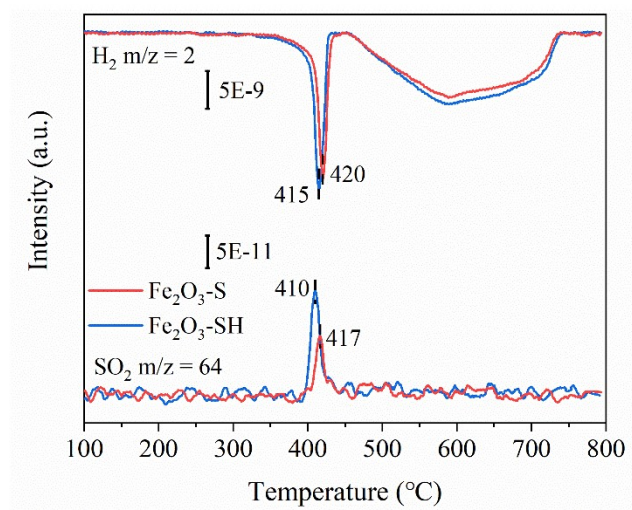

**Figure S10** H<sub>2</sub> and SO<sub>2</sub> signal during H<sub>2</sub>-TPR of Fe<sub>2</sub>O<sub>3</sub>-S and Fe<sub>2</sub>O<sub>3</sub>-SH catalysts.

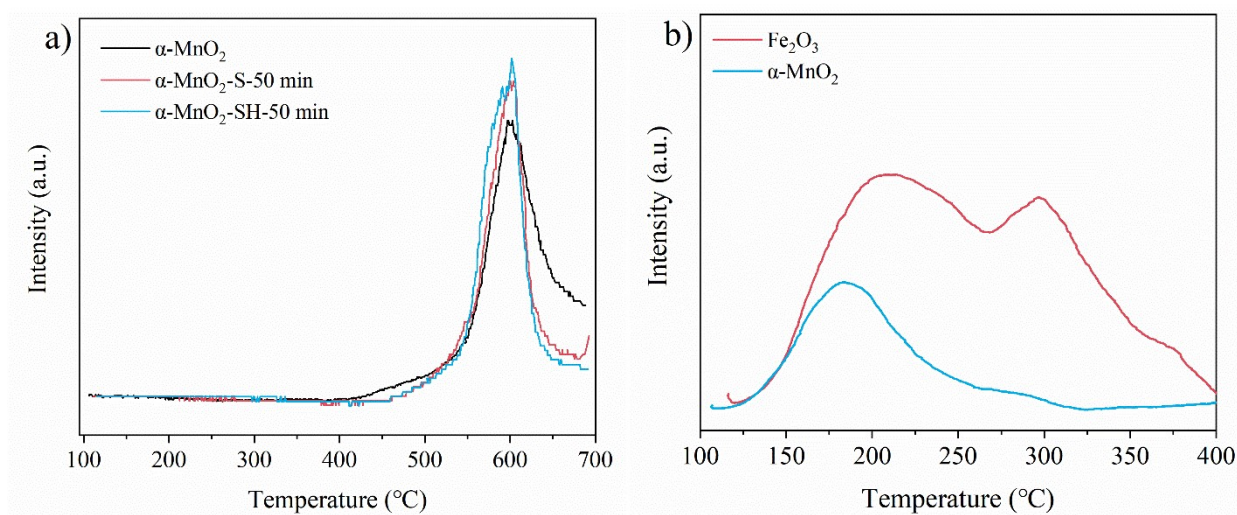

**Figure S11** (a)  $O_2$  signal ( $m/z = 32$ ) during  $NH_3$ -TPD of  $\alpha$ - $MnO_2$ ,  $\alpha$ - $MnO_2$ -S-50min, and  $\alpha$ - $MnO_2$ -SH-50min catalysts, and (b)  $NH_3$ -TPD patterns of  $\alpha$ - $MnO_2$  and  $Fe_2O_3$ .

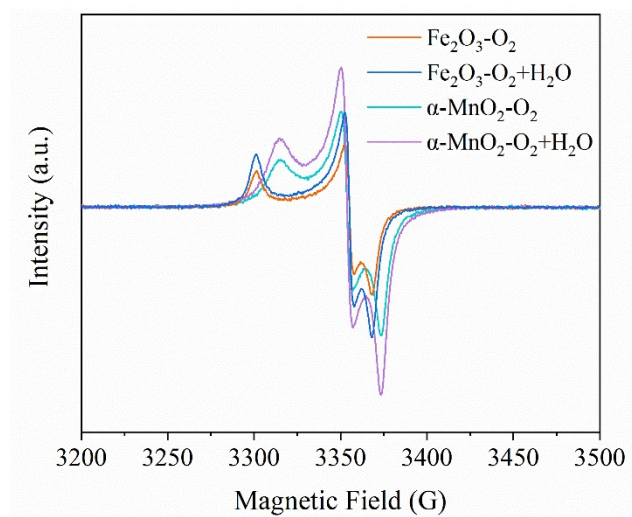

**Figure S12** EPR spectra of  $\text{Fe}_2\text{O}_3$  and  $\alpha\text{-MnO}_2$  catalysts after the pretreatment under  $\text{O}_2$  stream for 30 min and pretreatment under  $\text{O}_2$  and  $\text{H}_2\text{O}$  stream for 30 min.

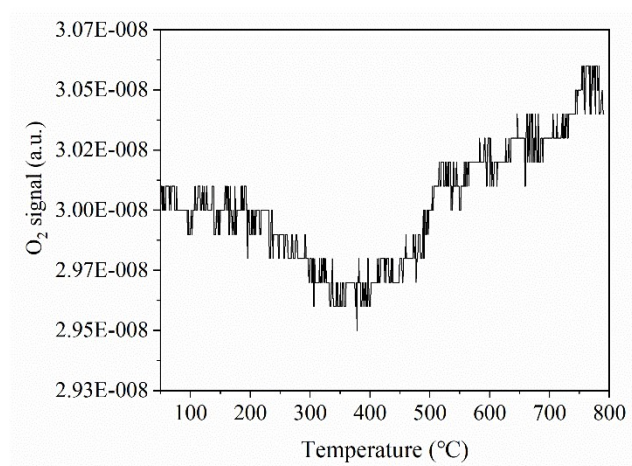

**Figure S13** O<sub>2</sub>-TPD pattern of Fe<sub>2</sub>O<sub>3</sub> catalyst after pre-adsorption with 5% O<sub>2</sub>/He.

The *in situ* DRIFTS tests were conducted at 250 °C under atmospheres of NO + NH<sub>3</sub> + O<sub>2</sub> + SO<sub>2</sub> with and without H<sub>2</sub>O and the spectra for Fe<sub>2</sub>O<sub>3</sub> and  $\alpha$ -MnO<sub>2</sub> catalysts after 30 min of adsorption are shown in Figure S14. For Fe<sub>2</sub>O<sub>3</sub> catalyst, after the adsorption of NO + NH<sub>3</sub> + O<sub>2</sub> + SO<sub>2</sub> at 250 °C, the spectra (Figure S14 (A1)) revealed characteristic bands of sulfur-containing species: sulfate species (990 and 1093 cm<sup>-1</sup>)<sup>8</sup> and vibrational peaks of HSO<sub>4</sub><sup>-</sup> species (1258 and 1163 cm<sup>-1</sup>).<sup>13-15</sup> The asymmetric deformation vibration of NH<sub>4</sub><sup>+</sup> adsorbed on Brønsted acid sites (1432 cm<sup>-1</sup>)<sup>16</sup> and coordinated NH<sub>3</sub> on Lewis acid sites (1557 cm<sup>-1</sup>)<sup>17</sup> were also detected, along with a band at 1354 cm<sup>-1</sup> assigned to cis-hyponitrite (cis-N<sub>2</sub>O<sub>2</sub><sup>2-</sup>)<sup>18</sup>. Following the introduction of 5 vol% H<sub>2</sub>O (Figure S14 (A2)), the spectra exhibited bands corresponding to sulfate (980, 1010, and 1098 cm<sup>-1</sup>)<sup>8, 19</sup>, sulfite (1032 cm<sup>-1</sup>), and HSO<sub>4</sub><sup>-</sup> species (1230 and 1160 cm<sup>-1</sup>), while coordinated NH<sub>3</sub> on Lewis acid sites remained observable (1557 cm<sup>-1</sup>).<sup>17</sup> Consistent with the observations at 200 °C, HSO<sub>4</sub><sup>-</sup> was identified as the dominant sulfur-containing species on Fe<sub>2</sub>O<sub>3</sub> surface. Furthermore, the presence of H<sub>2</sub>O also eliminated both NO<sub>x</sub> adsorbed species and NH<sub>4</sub><sup>+</sup> species on Brønsted acid sites.

As shown in Figure S14 (B1), upon adsorption of NO + NH<sub>3</sub> + O<sub>2</sub> + SO<sub>2</sub> on  $\alpha$ -MnO<sub>2</sub> catalyst, characteristic peaks of sulfate species were observed at 983,<sup>20, 21</sup> 1124,<sup>22</sup> and 1224 cm<sup>-1</sup>.<sup>13, 23, 24</sup> Peaks at 930 and 966 cm<sup>-1</sup> were assigned to weakly adsorbed NH<sub>3</sub><sup>25</sup> and the band at 1428 cm<sup>-1</sup> corresponded to NH<sub>4</sub><sup>+</sup> on Brønsted acid sites. Additionally, a weakly adsorbed NO<sub>2</sub> species was also detected at 1401 cm<sup>-1</sup>. In the presence of H<sub>2</sub>O (Figure S14 (B2)), several absorption peaks associated with sulfur-containing species were observed, including sulfate (1011, 1101, and 1210 cm<sup>-1</sup>) and sulfite (1052 cm<sup>-1</sup>).<sup>26, 27</sup> The peak at 1432 cm<sup>-1</sup> was assigned to NH<sub>4</sub><sup>+</sup> adsorbed on Brønsted acid sites. Additionally, vibrational bands for cis-N<sub>2</sub>O<sub>2</sub><sup>2-</sup> (1340 cm<sup>-1</sup>) and weakly adsorbed NO<sub>2</sub> species (1401 and 1630 cm<sup>-1</sup>) were identified. Consistent with the behavior at 200 °C, the introduction of H<sub>2</sub>O increased the variety of weakly adsorbed NO<sub>2</sub> species on  $\alpha$ -MnO<sub>2</sub> surface at 250 °C.

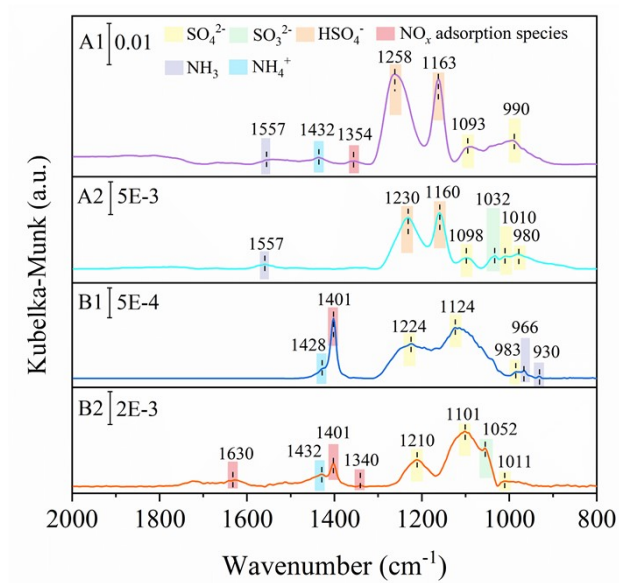

**Figure S14** *In situ* DRIFT spectra of (A1, B1) NO + NH<sub>3</sub> + O<sub>2</sub> + SO<sub>2</sub> and (A2, B2) NO + NH<sub>3</sub> + O<sub>2</sub> + SO<sub>2</sub> + H<sub>2</sub>O adsorption of (A1, A2) Fe<sub>2</sub>O<sub>3</sub> and (B1, B2) α-MnO<sub>2</sub> catalysts at 250 °C.

The NO<sub>x</sub>-TPD results are shown in Figure S15<sup>†</sup>. As presented in Figure S15 (a)<sup>†</sup>, the NO desorption peaks observed at 202 and 284 °C for Fe<sub>2</sub>O<sub>3</sub>-S-50min sample corresponded to the decomposition of monodentate nitrate and nitrite species, while the high-temperature desorption peaks at 434 and 514 °C were attributed to the decomposition of thermally more stable bridged nitrate and bidentate nitrate species.<sup>28</sup> In contrast, only three desorption peaks at 200, 429, and 509 °C were detected for Fe<sub>2</sub>O<sub>3</sub>-SH-50min sample. And two similar weak NO<sub>2</sub> desorption peaks located below 350 °C were also observed for both Fe<sub>2</sub>O<sub>3</sub>-S-50min and Fe<sub>2</sub>O<sub>3</sub>-SH-50min samples. Notably, the NO desorption peak area of Fe<sub>2</sub>O<sub>3</sub>-SH-50min was significantly smaller than that of Fe<sub>2</sub>O<sub>3</sub>-S-50min. Furthermore, compared with Fe<sub>2</sub>O<sub>3</sub>-S-50min, Fe<sub>2</sub>O<sub>3</sub>-SH-50min showed a decrease in NO desorption amount in the low-temperature region (< 350 °C), while a noticeable increase in desorption amount was observed in the high-temperature region (> 350 °C). Literature study suggests that thermally stable nitrate species compete with NH<sub>3</sub> for adsorption sites, and their strong adsorption could inhibit the further adsorption and activation of NH<sub>3</sub>.<sup>29</sup> Therefore, H<sub>2</sub>O introduction led to significantly weaker NO adsorption on Fe<sub>2</sub>O<sub>3</sub>-SH-50min than that on Fe<sub>2</sub>O<sub>3</sub>-S-50min, in agreement with *in situ* DRIFTS result.

As shown in Figure S15 (b)<sup>†</sup>, both α-MnO<sub>2</sub>-S-50min (281 and 474 °C) and α-MnO<sub>2</sub>-SH-50min (266 and 466 °C) exhibited two NO desorption peaks and one weak NO<sub>2</sub> desorption peak (150–350 °C). The low-temperature peaks (281 and 266 °C) were assigned to the decomposition of monodentate nitrate and nitrite species, while the high-temperature peaks (474 and 466 °C) corresponded to the decomposition of bridged nitrate and bidentate nitrate species. α-MnO<sub>2</sub>-SH-50min had comparable NO desorption peak area to α-MnO<sub>2</sub>-S-50min, and its NO<sub>2</sub> desorption peak area was slightly smaller than that of α-MnO<sub>2</sub>-S-50min sample. Notably, the low-temperature desorption peak (< 350 °C) of α-MnO<sub>2</sub>-SH-50min shifted toward lower temperature, suggesting lower thermal stability of the adsorbed nitrate species on its surface, which serves as an important indicator of enhanced surface NO activation capability and increased weak NO<sub>x</sub> adsorption species in agreement with *in situ* DRIFTS result.<sup>30</sup>

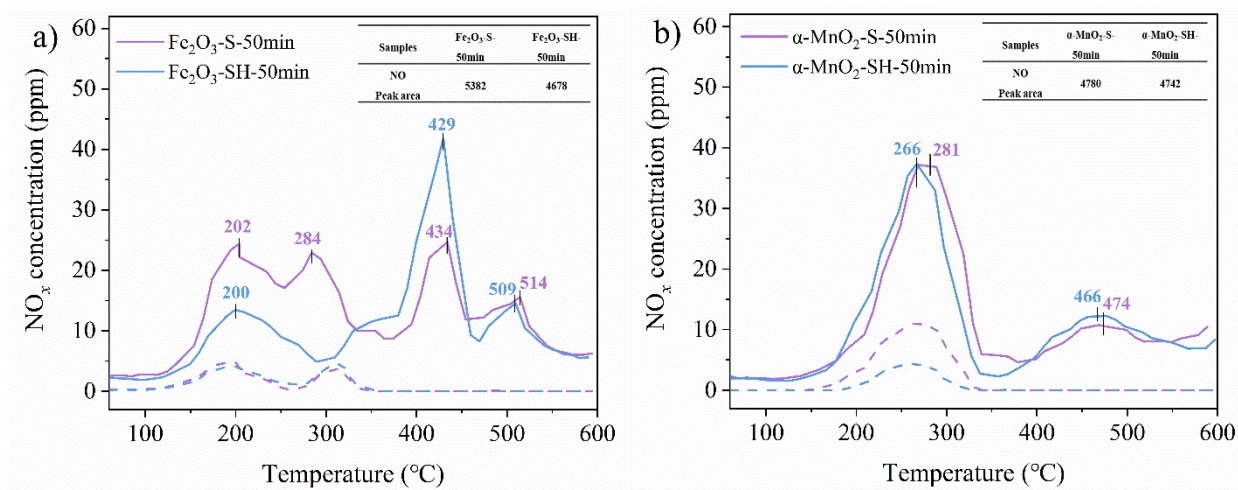

**Figure S15**  $\text{NO}_x$ -TPD patterns of (a)  $\text{Fe}_2\text{O}_3$ -S-50min and  $\text{Fe}_2\text{O}_3$ -SH-50min and (b)  $\alpha\text{-MnO}_2$ -S-50min and  $\alpha\text{-MnO}_2$ -SH-50min catalysts (solid and dashed lines represent NO and  $\text{NO}_2$ , respectively).



## References

1. G. Busca, L. Lietti, G. Ramis and F. Berti, *Appl. Catal. B Environ.*, 1998, **18**, 1-36.
2. Y. Yu, W. Tan, D. An, X. Wang, A. Liu, W. Zou, C. Tang, C. Ge, Q. Tong, J. Sun and L. Dong, *Appl. Catal. B Environ.*, 2021, **281**, 119544.
3. Z. C. Chen, R. T. Guo, S. Ren, L. Chen, X. D. Li and M. M. Wang, *J. Mater. Chem. A*, 2022, **10**, 21474-21491.
4. E. Darezereshki, F. Bakhtiari, M. Alizadeh, A. B. Vakylabad and M. Ranjbar, *Mater. Sci. Semicond. Process.*, 2012, **15**, 91-97.
5. Z. B. Wu, R. B. Jin, H. Q. Wang and Y. Liu, *Catal. Commun.*, 2009, **10**, 935-939.
6. S. Q. Cheng, F. Xu, S. Yang, B. F. Zhang, W. Song, X. C. Zhu, W. Tan, C. Z. Sun and L. Dong, *Environ. Sci. Technol.*, 2024, **58**, 8955-8965.
7. J. X. Song, M. Y. Liu, X. C. Ma, Q. W. Tian, J. K. Feng, X. T. Zhong and F. Duan, *J. Alloys Compd.*, 2023, **962**, 171208.
8. D. Q. An, S. Yang, W. X. Zou, J. F. Sun, W. Tan, J. W. Ji, Q. Tong, C. Z. Sun, D. Li and L. Dong, *J. Phys. Chem. C*, 2022, **126**, 12168-12177.
9. N. Giroud, S. Dorge and G. Trouvé, *J. Hazard. Mater.*, 2010, **184**, 6-15.
10. C. Guimon, A. Gervasini and A. Auroux, *J. Phys. Chem. B*, 2001, **105**, 10316-10325.
11. H. M. Khalafbadam, J. T. Darian and M. S. Yazd, *Fuel Process. Technol.*, 2025, **277**, 108318.
12. M. Y. Liu, X. D. Li, S. Ren, L. Wang, F. G. Li, C. He, S. N. Chai, C. L. Zheng, X. Z. Li and C. B. C. Xu, *Chem. Eng. J.*, 2025, **524**, 169007.
13. W. Q. Xu, L. Gao, Y. Yang, T. Y. Zhu and G. S. Qi, *Environ. Sci. Pollut. Res.*, 2020, **27**, 30243-30253.
14. H. D. Xie, C. Chen, P. W. He, G. Mu, K. K. Wang, C. Yang, S. N. Chai, N. Wang and C. M. Ge, *Appl. Surf. Sci.*, 2022, **600**, 154146.
15. D. Stoilova and H. D. Lutz, *J. Mol. Struct.*, 2002, **606**, 267-272.
16. M. A. Centeno, I. Carrizosa and J. A. Odriozola, *Appl. Catal., B*, 2001, **29**, 307-314.
17. N. Zhu, W. P. Shan, Z. H. Lian, Y. Zhang, K. Liu and H. He, *J. Hazard. Mater.*, 2020, **382**, 120970.
18. K. I. Hadjiivanov, *Catal. Rev.*, 2000, **42**, 71-144.
19. Y. D. Cai, B. F. Zhang, H. W. Yu, X. Y. Ji, J. F. Sun, X. Z. Wang, Q. H. Qian, L. L. Li, A. N. Liu, W. Tan, F. Gao and L. Dong, *Appl. Catal. B: Environ. Energy*, 2024, **342**, 123424.
20. Q. M. Liang, J. Li, H. He, T. Yue and L. Tong, *J. Environ. Sci.*, 2020, **90**, 253-261.

21. Q. Xie, D. Q. An, L. S. Zhou, T. Z. Li, Z. H. Hu, M. H. Chen, M. L. Ma, L. Zhang, J. F. Sun and L. Dong, *J. Rare Earths*, 2024, **42**, 1056-1065.
22. B. L. Zhang, M. Liebau, W. Suprun, B. Liu, S. G. Zhang and R. Gläser, *Catal. Sci. Technol.*, 2019, **9**, 4759-4770.
23. K. L. Song, C. Gao, P. Lu, D. D. Ma, Y. H. Cheng and J. W. Shi, *Fuel*, 2023, **331**, 125861.
24. L. Zhu, Z. P. Zhong, J. M. Xue, Y. Y. Xu, C. H. Wang and L. X. Wang, *J. Environ. Sci.*, 2018, **65**, 306-316.
25. J. X. Wang, X. F. Yi, D. Ng, H. R. Li, J. F. Miao, Q. F. Su, J. S. Chen and Z. L. Xie, *Top Catal.*, 2020, **63**, 913-923.
26. Y. Zhang, S. Yang, X. Y. Zhu, X. L. Xu, F. Huang, Z. N. Yang and C. Z. Sun, *J. Colloid Interface Sci.*, 2022, **606**, 1445-1456.
27. J. W. Ji, N. Z. Gao, W. Song, Y. Tang, Y. D. Cai, L. Han, L. J. Cheng, J. F. Sun, S. G. Ma, Y. H. Chu, C. J. Tang and L. Dong, *Appl. Catal. B: Environ. Energy*, 2023, **324**, 122263.
28. R. Yu, Z. C. Zhao, C. Shi and W. P. Zhang, *J. Phys. Chem. C*, 2019, **123**, 2216-2227.
29. Y. X. Yu, W. Tan, D. Q. An, C. J. Tang, W. X. Zou, C. Y. Ge, Q. Tong, F. Gao, J. F. Sun and L. Dong, *Catal. Today*, 2021, **375**, 614-622.
30. Q. Y. Zhou, C. Tan, T. F. Tang, Y. Wang, S. Y. Li, M. L. Tao, H. L. Zhang, L. Yang and C. J. Tang, *Sep. Purif. Technol.*, 2025, **368**, 133009.
